# Supplementary material for: SMAUG v1.0 – a user-friendly muon simulator for the imaging of geological objects in 3-D
Source: Copernicus journal article supplement (doi:10.5194/gmd-15-2441-2022), 2022-03-22
Supplement: Supplementary file 1 [file gmd-15-2441-2022-supplement.zip]

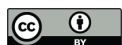

*Supplement of*

**SMAUG v1.0 – a user-friendly muon simulator for the imaging of geological objects in 3-D**

**Alessandro Lechmann et al.**

*Correspondence to:* Alessandro Lechmann ([alessandro.lechmann@geo.unibe.ch](mailto:alessandro.lechmann@geo.unibe.ch))

- [gmd-15-2441-2022-supplement-title-page.pdf](#)
- [bulk\\_density.xlsx](#)
- [grain\\_density.xlsx](#)
- [skeletal\\_density.xlsx](#)
- [xrf\\_data.xlsx](#)

The copyright of individual parts of the supplement might differ from the article licence.
